# Supplementary material for: Epidermal growth factor receptor-regulated miR-125a-5p – a metastatic inhibitor of lung cancer
Source: PubMed Central journal article supplement (PMC2776928; doi:10.1111/j.1742-4658.2009.07238.x), 2009-10
Supplement: ejb0276-5571-SD1.pdf [file ejb0276-5571-SD1.pdf]

Additional file Table S1 Primers of RT and PCR used in RT-PCR.

| RNA name    | RTprimer                                                                 | Forward primer                    | Backward primer                         |
|-------------|--------------------------------------------------------------------------|-----------------------------------|-----------------------------------------|
| let-7i      | ABI                                                                      | ABI                               | ABI                                     |
| miR-24      | 5'GTCGTATCCAGTGCG<br>TGTCGTGGAGTCGGCA<br>ATTGCACTGGATACGA<br>CCTGTTCC 3' | 5'TGTCGTGG<br>AGTCGGCAA<br>T 3'   | 5'TGGCTC<br>AGTTCAG<br>CAGGA3'          |
| miR-25      | 5'GTCGTATCCAGTGCG<br>TGTCGTGGAGTCGGCA<br>ATTGCACTGGATACGA<br>CTCAGCC 3'  | 5'AGTGCGTG<br>TCGTGGAGT<br>CGG 3' | 5'CATTGC<br>ACTTGTC<br>TCGGTCT<br>G3'   |
| miR-29b     | 5'GTCGTATCCAGTGCG<br>TGTCGTGGAGTCGGCA<br>ATTGCACTGGATACGA<br>CAACACTG 3' | 5'AGTGCGT<br>GTCGTGGA<br>GT 3'    | 5'TAGCA<br>CCATTG<br>AAATCAG<br>T3'     |
| miR-125a-5p | 5'GTCGTATCCAGTGCA<br>GGGTCCGAGGTATTCG<br>CACTGGATACGACTCA<br>CAGG3'      | 5'GGGTCCG<br>AGGTATTCG<br>CACT3'  | 5'TCCCTG<br>AGACCCT<br>TTAACCT<br>GTG3' |
| 5S          | 5'GGCCCGACCCTGCT<br>TAG3'                                                | 5'TCTACGGC<br>CATACCACC           | 5'GGCCC<br>GACCCTG                      |

|       |     |         |         |
|-------|-----|---------|---------|
|       |     | CTGAA3' | CTTAG3' |
| RUN6B | ABI | ABI     | ABI     |

Additional file Table S2 Additional miRNAs responding to gefitinib treatment in lung cancer cells ( $P < 0.01$ )

| Name       | Un-treated | Gefitinib treatment | Log ratio |
|------------|------------|---------------------|-----------|
| miR-127-3p | 51         | 881                 | 4.39      |
| miR-376c   | 20         | 1 047               | 4.13      |
| miR-495    | 28         | 392                 | 3.51      |
| miR-494    | 55         | 1 080               | 3.46      |
| miR-376a   | 14         | 170                 | 3.35      |
| miR-379    | 39         | 670                 | 3.24      |
| miR-487b   | 34         | 704                 | 3.23      |
| miR-654-3p | 48         | 169                 | 3.18      |
| miR-143    | 24         | 359                 | 2.8       |
| miR-134    | 49         | 509                 | 2.79      |
| miR-329    | 19         | 187                 | 2.79      |
| miR-299-5p | 27         | 197                 | 2.46      |
| miR-29c    | 792        | 1 124               | 1.55      |
| miR-22     | 746        | 1 053               | 0.46      |
| miR-100    | 9 420      | 6 234               | -0.28     |
| miR-31     | 6 505      | 5 403               | -0.48     |

---

|            |        |       |       |
|------------|--------|-------|-------|
| miR-107    | 3 352  | 1 952 | -0.72 |
| miR-151-3p | 1 277  | 702   | -0.79 |
| miR-185    | 677    | 440   | -0.80 |
| miR-425    | 740    | 388   | -0.82 |
| miR-103    | 3 997  | 2 178 | -0.87 |
| miR-191    | 5 309  | 2 538 | -0.88 |
| miR-28-5p  | 512    | 242   | -0.98 |
| miR-320    | 8 351  | 4 238 | -1.05 |
| miR-132    | 628    | 325   | -1.09 |
| miR-16     | 11 899 | 6 345 | -1.10 |
| miR-92a    | 13 630 | 6 233 | -1.30 |
| miR-423-5p | 3 117  | 1 336 | -1.29 |
| miR-20a    | 6 759  | 2 432 | -1.30 |
| miR-194    | 909    | 253   | -1.31 |
| miR-200b   | 2 695  | 579   | -1.35 |
| miR-98     | 359    | 118   | -1.65 |
| miR-93     | 3 214  | 969   | -1.74 |
| miR-92b    | 6 099  | 1 699 | -1.93 |
| miR-374b   | 958    | 220   | -2.07 |
| miR-205    | 1 288  | 1 780 | -2.30 |
| miR-877    | 438    | 78    | -2.39 |
| miR-584    | 1 020  | 190   | -2.42 |

---

---

|          |       |       |       |
|----------|-------|-------|-------|
| miR-454  | 624   | 71    | -2.87 |
| miR-203  | 743   | 73    | -3.36 |
| miR-182  | 4 666 | 1 005 | -3.66 |
| miR-196a | 178   | 18    | -5.88 |

---
